# Supplementary material
Source: publisher figshare collection journal article supplement (https://acs.figshare.com/ndownloader/files/5136847)
Supplement: Supplementary file 1 [file 5136847]

## **Supporting Information**

# **Catalytically active $\mu$ -oxodiiron(IV) oxidants from iron(III) and dioxygen**

Anindya Ghosh, Filipe Tiago de Oliveira, Toshihiro Yano, Takanori Nishioka, Evan S. Beach, Isamu Kinoshita,<sup>\*</sup> Eckard Münck,<sup>\*</sup> Alexander D. Ryabov, Colin P. Horwitz, Terrence J. Collins<sup>\*</sup>

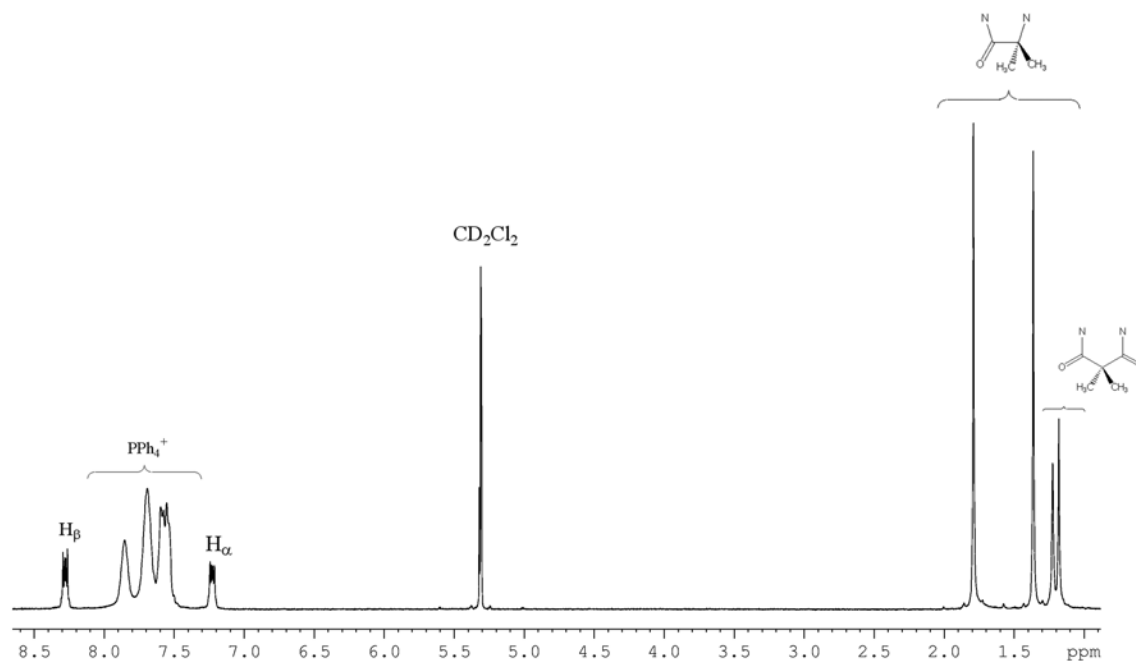

Figure S1.  $^1\text{H}$  NMR spectrum (300 MHz,  $\text{CD}_2\text{Cl}_2$ ) of **2a**.  $\delta$ : 1.18 (s, 6 H, diastereotopic  $\text{CH}_3$  6-membered rings), 1.23 (s, 6 H, diastereotopic  $\text{CH}_3$  6-membered rings), 1.36 (s, 12 H, diastereotopic  $\text{CH}_3$  5-membered rings), 1.79 (s, 12 H, diastereotopic  $\text{CH}_3$  5-membered rings), 7.23 (m, 4 H, macrocyclic ArH), 7.57-7.85 (m,  $\text{PPh}_4^+$ ), 8.27 (m, 4 H, macrocyclic ArH)

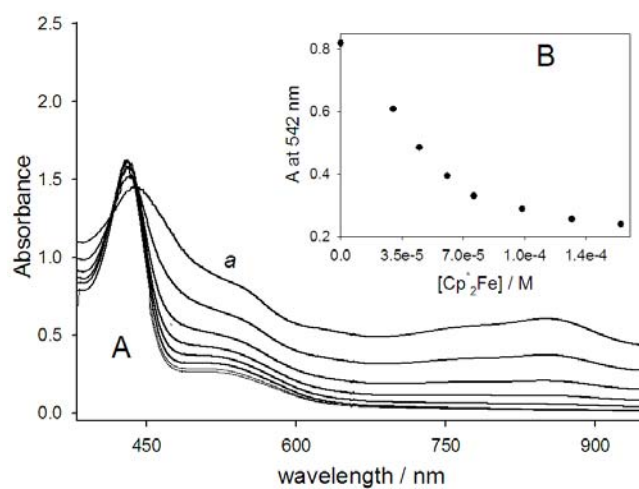

Figure S2. (A) Changes in the UV/Vis spectrum upon incremental addition of  $\text{Cp}^*_2\text{Fe}$  to **2a** (0.109 mM) in dichloromethane. Spectrum *a* was obtained at time  $t = 0$ . (B) Change in absorbance at 542 nm as a function of  $[\text{Cp}^*_2\text{Fe}]$ .

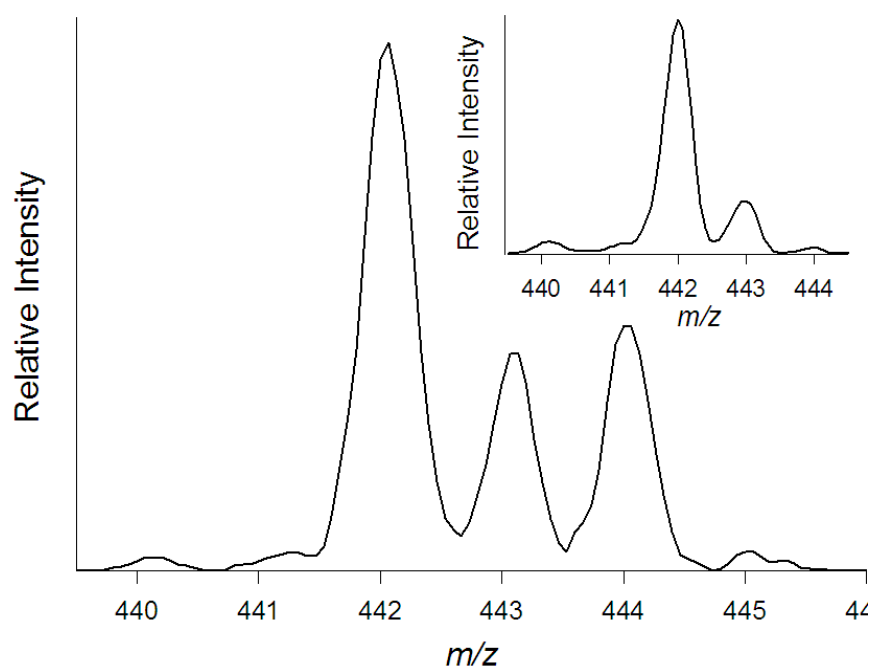

Figure S3. The ESI-MS analysis of a dichloromethane solution of **2a**. Compound **2a** was prepared by reacting  $[\text{PPh}_4]\mathbf{1a}\text{-H}_2\text{O}$  with  $^{18}\text{O}_2$  giving 31%  $^{18}\text{O}$  incorporation. Inset shows the isotope distribution of  $m/z$  442 of **2a** prepared from  $^{16}\text{O}_2$ .

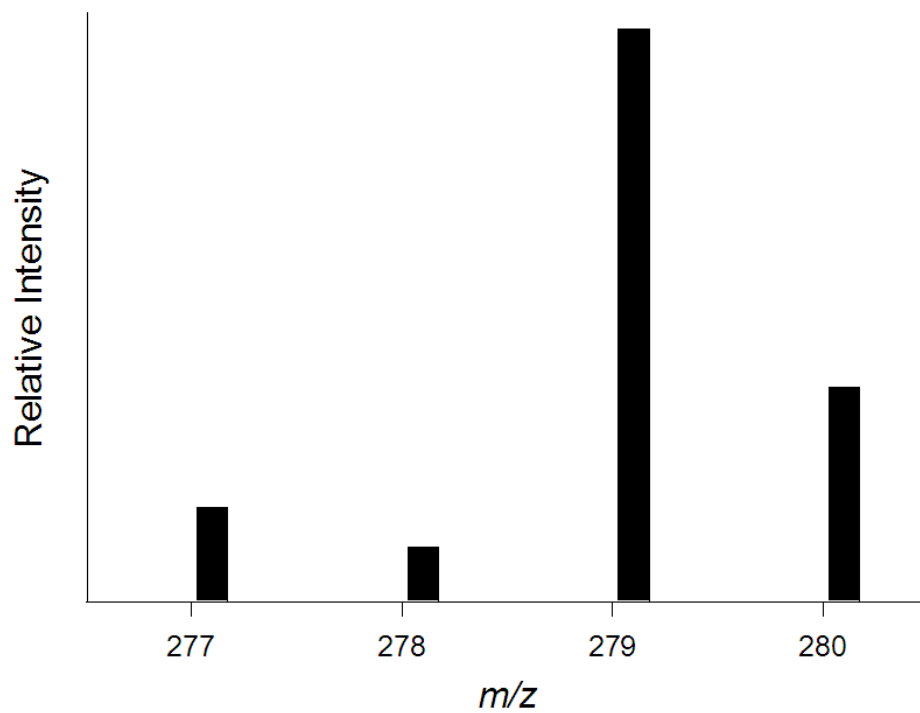

Figure S4. The mass spectrum of 86%  $^{18}\text{O}$  enriched  $\text{OPPh}_3$  {(M-1) $^+$  peak is shown}.

Compound **2a** was generated from  $[\text{PPh}_4]\mathbf{1a}\text{-H}_2^{18}\text{O}$  and  $^{18}\text{O}_2$  in  $\text{CH}_2\text{Cl}_2$ .

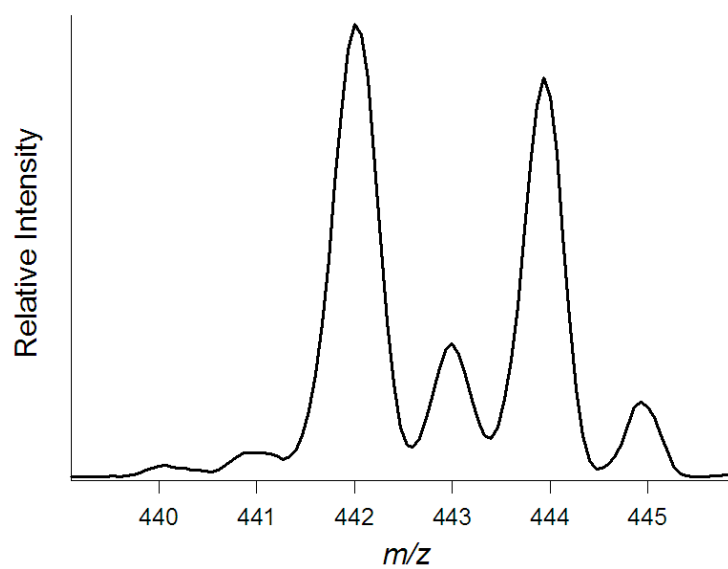

Figure S5. The ESI mass spectrum of compound **2a** that was generated from [PPh<sub>4</sub>]**1a**-H<sub>2</sub><sup>18</sup>O, dissolved in dichloromethane, and then exposed to <sup>16</sup>O<sub>2</sub>. 44% of <sup>18</sup>O incorporation was found in **1a**(O); peak at  $m/z = 444$ .

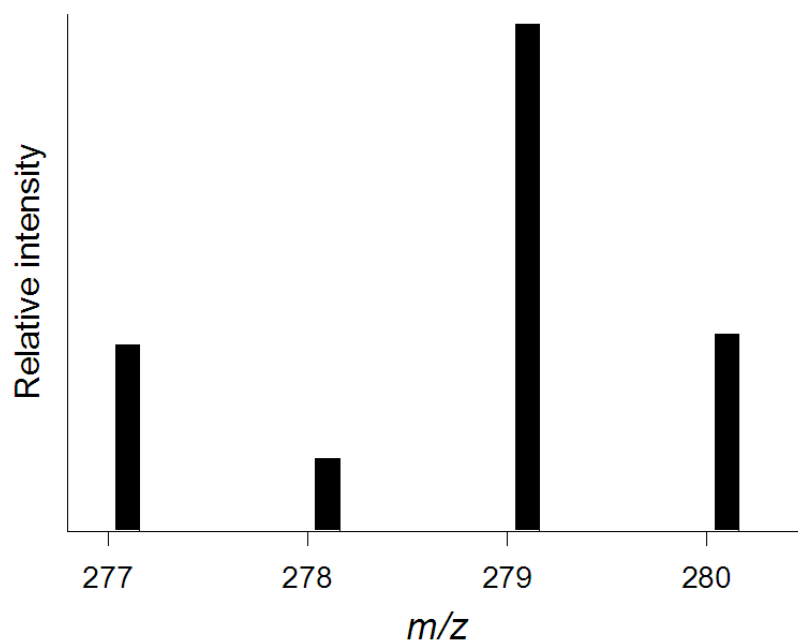

Figure S6. The GC-MS spectrum of the  $^{18}\text{O}$  enriched  $\text{OPPh}_3$   $\{(\text{M}-1)^+\}$  peak is shown}.

Compound **2a** was stirred with  $\text{H}_2^{18}\text{O}$  (95%) for 3 h and then reacted with  $\text{PPh}_3$ . 73% incorporation of  $^{18}\text{O}$ -isotope in  $\text{OPPh}_3$ ; peak at  $m/z$  279.

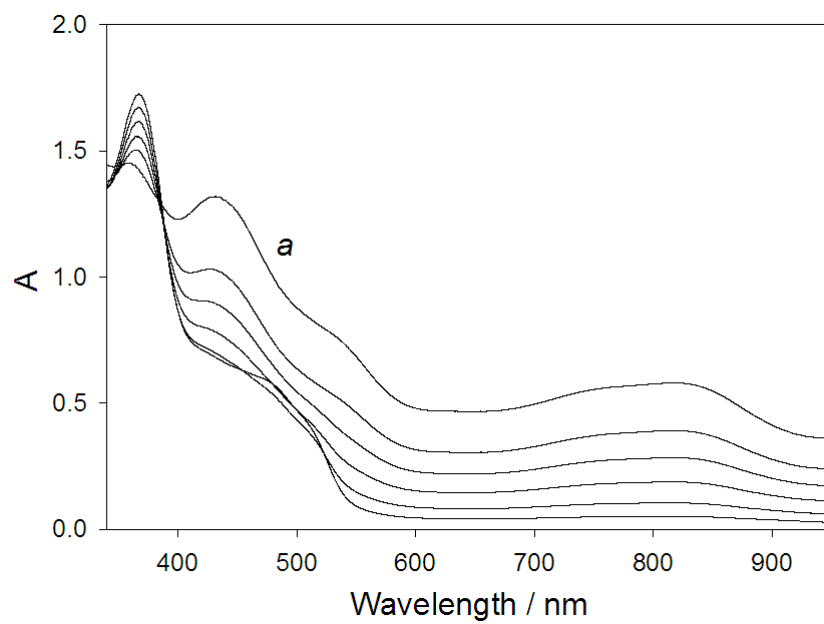

Figure S7. **(A)** Changes in the UV/Vis spectrum upon incremental addition of Orange II to **2a** ( $1.12 \times 10^{-4}$  M) dissolved in acetonitrile/water mixture (1:1). Spectrum *a* is of **2a** before dye addition.
